# Supplementary material for: Periodontal therapy increases neutrophil extracellular trap degradation
Source: PubMed Central journal article supplement — Innate Immun. 2019 Nov 22;26(5):331–40. doi: 10.1177/1753425919889392 (PMC7903525; doi:10.1177/1753425919889392), 2019-11-22
Supplement: INI889392_Supplemetal_Material.pdf [file INI889392_Supplemetal_Material.pdf]

**Supplementary Table S1.** Baseline and follow-up results of non-surgical periodontal therapy for study population of part 2 ( $n = 91$ ).

|                      | <b>Baseline</b> | <b>3 mo</b> | <b>6 mo</b> | <b>12 mo</b> |
|----------------------|-----------------|-------------|-------------|--------------|
| Mean PPD (mm)        | 3.9 ± 0.6       | 2.8 ± 0.4   | 2.8 ± 0.4   | 2.8 ± 0.5    |
| Mean CAL (mm)        | 4.2 ± 0.9       | 3.7 ± 1.0   | 3.6 ± 1.0   | 3.6 ± 1.0    |
| Mean BOP (%)         | 66.3 ± 14.8     | 21.2 ± 12.7 | 20.7 ± 13.5 | 21.8 ± 13.8  |
| Mean plaque (%)      | 62.8 ± 24.2     | 18.2 ± 16.4 | 21.7 ± 20.2 | 20.1 ± 15.6  |
| Sites PPD ≥ 6 mm (%) | 34.0 ± 17.7     | 6.8 ± 7.5   | 6.2 ± 7.9   | 6.5 ± 8.2    |

Clinical parameters of patients **of part 2** before (Baseline) and 3, 6, and 12 mo after non-surgical treatment. This table is adjusted from the previously published study by Bizzarro et al. (2016). Values represent means ± SD.
